# Supplementary material
Source: HighWire-hosted journal article supplement (https://bmjopensem.bmj.com/content/9/1/e001494)
Supplement: inline-supplementary-material-1 [file inline-supplementary-material-1.pdf]

## Supplementary Information: Neurogenic Inflammation in Tendinopathy

| Number | Criteria                                                                                                       | Decision Rule                                                                                                                                                                                                                                            | Yes/No/Unclear |
|--------|----------------------------------------------------------------------------------------------------------------|----------------------------------------------------------------------------------------------------------------------------------------------------------------------------------------------------------------------------------------------------------|----------------|
| 1      | <b>Recruitment</b> method clearly reported?                                                                    | Yes, if the study states how participants were recruited.<br><br>No, if the method of recruitment is not stated or is unclear.                                                                                                                           |                |
| 2      | <b>Inclusion/exclusion criteria</b> clearly described?                                                         | Yes, if clear eligibility criteria for participant inclusion and/or exclusion are reported.<br><br>No, if eligibility criteria are not given or are unclear                                                                                              |                |
| 3      | <b>Study Population:</b> Are the <b>cases and controls</b> recruited over the same period of time?             | Yes, if it is stated that cases and controls were recruited concurrently.<br><br>No, if cases and controls were not recruited concurrently, if recruitment times were unclear or if recruitment times were not reported.<br>Score N/A if only one group. |                |
| 4      | <b>Study Population:</b> Are cases and controls drawn from the same population?                                | Yes, if both the case and control group were drawn from the same source population.<br><br>No, if case and controls groups are from different populations or if unclear.<br>Score N/A if only one group.                                                 |                |
| 5      | <b>Study Population:</b> Are the participants representative of the population from which they were recruited? | Yes, if the study states that consecutive eligible participants were used, participants were randomly selected, or all participants were used from the source population.                                                                                |                |

|    |                                                                                                            |                                                                                                                                                                                                                                                                                                                      |  |
|----|------------------------------------------------------------------------------------------------------------|----------------------------------------------------------------------------------------------------------------------------------------------------------------------------------------------------------------------------------------------------------------------------------------------------------------------|--|
| 6  | <b>Case:</b> Is the case definition explicit?                                                              | <p>Yes, if the criteria for diagnosing injury is clearly described. OR<br/>         Yes, if diagnosis was made using established criteria and an appropriate reference is given (e.g. a consensus document).</p> <p>No, if the criteria for diagnosis are not given or are unclear.</p> <p>N/A if no case group.</p> |  |
| 7  | <b>Control:</b> Is the control group free from injury?                                                     | <p>Yes, if the method of confirming that the control group is free from the target injury is reported.</p> <p>No, if the method of confirming the control group is free of injury is not given or is unclear.</p> <p>Score N/A if only case group.</p>                                                               |  |
| 8  | <b>Method:</b> Were markers of neurogenic inflammation assessed identically in the case and control group? | <p>Yes, if the measurement of neurogenic inflammation was stated to be identical in the case and control group.</p> <p>No, if there were any differences in measurement technique between the case and control group.</p> <p>N/A if only one group.</p>                                                              |  |
| 9  | <b>Method:</b> Was the reliability of the measurement technique reported?                                  | <p>Yes, if reliability estimates of the measurement technique was calculated or a reliability study was cited.</p>                                                                                                                                                                                                   |  |
| 10 | <b>Method:</b> Was assessor blinding reported?                                                             | <p>Yes, if is stated that the assessor measuring sympathetic involvement was blind to injury status.</p>                                                                                                                                                                                                             |  |

|    |                                                                                                                                    |                                                                                                                                                                                                                                                                                                                                                                                                         |  |
|----|------------------------------------------------------------------------------------------------------------------------------------|---------------------------------------------------------------------------------------------------------------------------------------------------------------------------------------------------------------------------------------------------------------------------------------------------------------------------------------------------------------------------------------------------------|--|
|    |                                                                                                                                    | No, if the assessor is aware of injury status or if no mention is made of assessor blinding.<br>N/A if only one group.                                                                                                                                                                                                                                                                                  |  |
| 11 | <b>Method:</b> Were the observational tests used to assess the main outcomes appropriate?                                          | Yes, if the observational tests used were appropriate for the research question and the data with minimum 2 independent observers?<br><br>No, if no quantitative or semi-quantitative descriptive analysis was reported.                                                                                                                                                                                |  |
| 12 | <b>Method:</b> Are the distributions of principal confounders in each group of subjects to be compared clearly described?          | Yes, if summaries of participant age, sex, BMI (or height and weight) are provided for the case and control group.<br><br>No if study did not provide data for at least these factors.                                                                                                                                                                                                                  |  |
| 13 | <b>Data Analysis:</b> Are differences between neurogenic inflammation markers between the case and control group clearly reported? | Yes, if the comparison of neurogenic inflammation between case and control groups is clearly described. OR<br>Yes, if data is provided in sufficient detail to calculate a comparison between the case and control groups<br><br>No, if comparison is not clearly described.<br>No, if comparison is given as significant or non-significant without p-value or detailed data.<br>N/A if only one group |  |
| 14 | <b>Data Analysis:</b> Does the study provide estimates of the random variability in the data for the main outcomes?                | Yes, if an estimate of data variability is provided for sympathetic involvement. Acceptable estimates include SD, SE, and IQR.                                                                                                                                                                                                                                                                          |  |

|     |                                                   |                                                                                                                                         |  |
|-----|---------------------------------------------------|-----------------------------------------------------------------------------------------------------------------------------------------|--|
|     |                                                   | No, if an estimate of data variability is not provided.<br>Range of scores not acceptable.<br>N/A if no statistical analysis performed. |  |
| 15. | <b>Study Design:</b> Study limitations addressed? | Yes, if study limitations appropriately addressed.<br><br>No, if study limitations are not listed.                                      |  |

**Supplementary Table 1: Methodological Quality Assessment Tool.** *N/A, Not applicable; SD, standard deviation; SE, standard error of the mean; IQR, Interquartile range*



| S.No. | Study                    | Type of study | Specimen                                 | Tendon                                        | Tissue                                               | Detection                                      |
|-------|--------------------------|---------------|------------------------------------------|-----------------------------------------------|------------------------------------------------------|------------------------------------------------|
| 1.    | Schmalzl J et al., 2019  | Case-Control  | Biopsies from living tissue              | Long head of biceps tendon                    | Tendon stump                                         | Immunohistochemistry                           |
| 2.    | Sahmey et al 2016        | Case Control  | Biopsies from living tissue              | Supraspinatus tendon                          | Tendon and tendon sheath                             | Immunohistochemistry                           |
| 3.    | Christensen J et al 2015 | Case-Control  | Biopsies from living tissue              | Achilles tendon                               | Mid-portion of Achilles Tendon (from ventral side)   | Immunofluorescence                             |
| 4.    | Dean et al 2015          | Case control  | Biopsies from living tissue              | Supraspinatus tendon                          | Within 1cm of bony insertion into greater tuberosity | Immunohistochemistry                           |
| 5.    | Fearon et al 2014        | Case Control  | Biopsies from living tissue              | Greater trochanteric bursa and gluteal tendon | Mid tendon                                           | Immunohistochemistry                           |
| 6.    | Franklin et al 2014      | Case Control  | Biopsies from living tissue              | Rotator Cuff tendon                           | Supraspinatus tendon                                 | Immunohistochemistry                           |
| 7.    | Sasaki et. al., 2013     | Case Control  | Biopsies from living tissue              | Extensor Carpi Radialis Brevis                | Capsular aspect of ECRB tendon                       | Immunohistochemistry                           |
| 8.    | Tosounidis et al 2013    | Case Control  | Biopsies from living tissue and cadavers | Long head of Biceps Brachii (LHB) tendon      | Tendon proper and surrounding tissue                 | Immunohistochemistry                           |
| 9.    | Schizas et al 2012       | Case Control  | Biopsies from living tissue              | Patellar tendon                               | Tendon proper and peritendinous loose CT             | Immunohistochemistry                           |
| 10.   | Bagge et al 2012         | Case Control  | Biopsies from living tissue              | Achilles tendon                               | Mid-portion                                          | In Situ Hybridization and Immunohistochemistry |

|            |                      |              |                             |                                                                                         |                                                                                           |                      |
|------------|----------------------|--------------|-----------------------------|-----------------------------------------------------------------------------------------|-------------------------------------------------------------------------------------------|----------------------|
| <b>11.</b> | Bjorklund et al 2011 | Case Control | Biopsies from living tissue | Achilles tendon                                                                         | Tendon mid-portion (tendon proper and paratendinous connective tissue)                    | Immunofluorescence   |
| <b>12.</b> | Xu et al 2011        | Case Control | Biopsies from living tissue | Rotator Cuff tendon - torn Supraspinatus tendon and matched intact Subscapularis tendon | Torn edges of Supraspinatus and intact subscapularis tendons                              | Immunohistochemistry |
| <b>13.</b> | Schizas et al 2010   | Case Control | Biopsies from living tissue | Patellar tendon                                                                         |                                                                                           | Immunofluorescence   |
| <b>14.</b> | Bagge et al 2009     | Case Control | Biopsies from living tissue | Achilles tendon                                                                         | Ventral part of mid tendon (tendon mid-portion)                                           | Immunofluorescence   |
| <b>15.</b> | Bjur et al 2009      | Case Control | Biopsies from living tissue | Achilles tendon                                                                         | Mid portion + paratendinous tissue                                                        | Immunohistochemistry |
| <b>16.</b> | Zeisiget al 2009     | Case Control | Biopsies from living tissue | Extensor carpi radialis brevis (ECRB) tendon                                            | Muscle origin at the lateral epicondyle (TE) & origin of the flexor muscles at the medial | Immunofluorescence   |



|     |                          |              |                                          |                                               |                                                       |                                                              |
|-----|--------------------------|--------------|------------------------------------------|-----------------------------------------------|-------------------------------------------------------|--------------------------------------------------------------|
|     |                          |              |                                          |                                               | epicondyle (GE)                                       |                                                              |
| 17. | Singaraju et al 2008     | Case Control | Biopsies from living tissue and cadavers | Long head of the biceps brachii (LHBB) tendon | Portion of the LHBB tendon above the bicipital groove | Immunohistochemistry                                         |
| 18. | Andersson et al 2008     | Case Control | Biopsies from living tissue              | Achilles tendon                               | Mid-portion tendon                                    | Immunofluorescence & In Situ Hybridization                   |
| 19. | Bjur et al 2008          | Case Control | Biopsies from living tissue              | Achilles tendon                               | Mid-portion tendon                                    | Immunofluorescence & In Situ Hybridization                   |
| 20. | Scott et al 2007         | Case Control | Biopsies from living tissue              | Patellar and Achilles tendon                  |                                                       | Immunofluorescence & In-Situ Hybridisation                   |
| 21. | Danielson et al 2007 (1) | Case Control | Biopsies from living tissue              | Patellar tendon                               |                                                       | In-Situ Hybridisation                                        |
| 22. | Danielson et al 2007 (2) | Case Control | Biopsies from living tissue              | Patellar tendon                               | Tendon proper                                         | Immunofluorescence                                           |
| 23. | Danielson et al 2006     | Case control | Biopsies from living tissue              | Patellar tendon                               | Proximal patellar tendon                              | Immunofluorescence & Immunostaining using EnVision detection |
| 24. | Lian et al 2006          | Case Control | Biopsies from living tissue              | Patellar tendon                               |                                                       | Immunofluorescence                                           |
| 25. | Bjur et al 2005          | Case Control | Biopsies from living tissue              | Achilles tendon                               | Mid-portion tendon                                    | Immunohistochemistry                                         |

|     |                          |              |                             |                                       |                                                                    |                                                                                 |
|-----|--------------------------|--------------|-----------------------------|---------------------------------------|--------------------------------------------------------------------|---------------------------------------------------------------------------------|
| 26. | Forsgren et al 2005      | Case control | Biopsies from living tissue | Patellar or Achilles tendon           | Proximal part of Patellar tendon<br>Mid-portion of Achilles tendon | Immunofluorescence                                                              |
| 27. | Alfredson et al 2001 (1) | Case Control | Biopsies from living tissue | Achilles tendon                       |                                                                    | Microdialysis – high performance liquid chromatography and Immunohistochemistry |
| 28. | Alfredson et al 2001 (2) | Case Control | Biopsies from living tissue | Patellar tendon                       |                                                                    | Microdialysis- high performance liquid chromatography and Immunohistochemistry  |
| 29. | Alfredson et al 2000     | Case Control | Biopsies from living tissue | Extensor Carpi Radialis Brevis tendon |                                                                    | In situ microdialysis                                                           |
| 30. | Alfredson et al 1999     | Case control | Biopsies from living tissue | Achilles tendon                       |                                                                    | In situ microdialysis                                                           |
| 31. | Ljung et al 1999         | Case Control | Biopsies from living tissue | Extensor Carpi radialis brevis tendon | Dorsal aspect of tendon insertion                                  | Immunohistochemistry                                                            |

Supplementary Table 2: Study Characteristics – part A

| Study                       | Group                                                                 | Tendon Status                  | Sample Size | Sex         | Age, years (mean and/or range) |
|-----------------------------|-----------------------------------------------------------------------|--------------------------------|-------------|-------------|--------------------------------|
| 1. Schmalzl J et al., 2019  | Case (arthroplasty, rotator cuff surgery, Isolated biceps surgery)    | Tendinopathy                   | 11          | 9 M<br>2 F  | 60-82                          |
|                             | Control (arthroplasty, rotator cuff surgery, Isolated biceps surgery) | No Tendinopathy                | 11          | 4 M<br>7 F  | 46-67                          |
| 2. Sahmey et al 2016        | Case (rotator cuff surgery)                                           | Tendinopathy                   | 4           | 2 M<br>2 F  | 39-53                          |
|                             | Control (arthroscopic re-stabilisation)                               | No Tendinopathy                | 1           | 1 M         | 20                             |
| 3. Christensen et al., 2015 | Case (Achilles' tendinosis surgery)                                   | Tendinopathy                   | 17          | 6 M<br>11 F | 27-68                          |
|                             | Control (healthy individuals)                                         | No Tendinopathy                | 4           | 4 M         | 21- 48                         |
| 4. Dean et al 2015          | Case (subacromial decompression surgery)                              | Tendinopathy                   | 9           | 7M<br>2F    | 51 +/- 8.2                     |
|                             | Control (5-years after subacromial decompression ('pain-free'))       | No Tendinopathy                | 9           | 6M<br>3F    | 52 /- 7.8                      |
| 5. Fearon et al 2014        | Case (gluteal tendon reconstructive surgery and bursectomy)           | Severe Tendinopathy (SD 12.65) | 34          | -           | -                              |
|                             | Control (total hip arthroplasty)                                      | Mild Tendinopathy (SD 10.43)   | 29          | -           | -                              |

| Study                    | Group                                                                                            | Tendon Status   | Sample Size | Sex          | Age, years (mean and/or range) |
|--------------------------|--------------------------------------------------------------------------------------------------|-----------------|-------------|--------------|--------------------------------|
| 6. Franklin et al 2014   | Case (arthroscopic or open tendon repair)                                                        | Tendinopathy    | 64          | 39 M<br>25 F | 50- 78                         |
|                          | Control (post-traumatic shoulder instability)                                                    | No Tendinopathy | 16          | 14 M<br>2 F  | 17-29                          |
| 7. Sasaki et. al., 2013  | Case (recalcitrant tennis elbow)                                                                 | Tendinopathy    | 8           | 2 M<br>6 F   | 38-66                          |
|                          | Control (ECRB capsule of Osteochondritis Dissecance of Capitellum)                               | No Tendinopathy | 2           | 1 M<br>1 F   | 15                             |
| 8. Tosounidis et al 2013 | Case: RC tear and biceps tendinitis                                                              | Tendinopathy    | 14          | 6 F<br>8 M   | 51-76                          |
|                          | Control A (shoulder hemiarthroplasty for management of complex proximal humerus fractures)       | No Tendinopathy | 17          | 1 M<br>16 F  | 56-81                          |
|                          | Control B (specimens from cadavers with no history of shoulder pain, trauma or systemic disease) | No Tendinopathy | 10          | 2 M<br>8 F   | 60- 82                         |
| 9. Schizas et al 2012    | Case (jumper's knee)                                                                             | Tendinopathy    | 10          | 9 M<br>1 F   | 19-32                          |
|                          | Control (tibial shaft fractures undergoing intramedullary nailing)                               | No Tendinopathy | 8           | 5 M<br>3 F   | 19-60                          |

| Study                    | Group                                                                                   | Tendon Status   | Sample Size | Sex          | Age, years (mean and/or range) |
|--------------------------|-----------------------------------------------------------------------------------------|-----------------|-------------|--------------|--------------------------------|
| 10. Bagge et al 2012     | Case (Achilles' tendinosis surgery)                                                     | Tendinopathy    | 2           | 1 M<br>1 F   | 29<br>52                       |
|                          | Control                                                                                 | No Tendinopathy | 2           | 2 F          | 47                             |
| 11. Bjorklund et al 2011 | Case (Achilles' tendinosis surgery)                                                     | Tendinopathy    | 17          | 8 M<br>9 F   | 28-70<br>47-68                 |
|                          | Control (healthy tendon)                                                                | No Tendinopathy | 7           | 3 M<br>4 F   | 39-46<br>21-47                 |
| 12. Xu et al 2011        | Case (rotator cuff tear repair)                                                         | Tendinopathy    | 26          | 14 M<br>12 F | 30-73                          |
|                          | Control (shoulder instability)                                                          | No Tendinopathy | 10          | 3 F<br>7 M   | 17-59                          |
| 13. Schizas et al 2010   | Case ((jumper's knee)                                                                   | Tendinopathy    | 10          | 9 M<br>1 F   | 19-32                          |
|                          | Control (tibia fractures- intramedullary nailing without current or previous knee pain) | No Tendinopathy | 8           | 5 M<br>3 F   | 16-53                          |
| 14. Bagge et al 2009     | Case (Achilles' tendinosis)                                                             | Tendinopathy    | 15          | 9 M<br>6 F   | 23-59                          |
|                          | Control (healthy tendon)                                                                | No Tendinopathy | 5           | 2 M<br>3 F   | 39-47                          |

| Study                    | Group                                                       | Tendon Status                     | Sample Size | Sex                        | Age, years (mean and/or range) |
|--------------------------|-------------------------------------------------------------|-----------------------------------|-------------|----------------------------|--------------------------------|
| 15. Bjur et al 2009      | Case (Achilles' tendinosis surgery)                         | Tendinopathy                      | 37          | 17 M<br>20 F               | 26-61                          |
|                          | Control (pain-free Achilles' tendons)                       | No Tendinopathy                   | 8           | 3 M<br>5 F                 | 21-47                          |
| 16. Zeisiget al 2009     | Case (tennis elbow surgery & golfer's elbow surgery)        | Tendinopathy                      | 7 & 4       | 4 M<br>3 F &<br>2 M<br>2 F | 32-52<br>24-40                 |
|                          | Control (pain free healthy individuals)                     | No Tendinopathy                   | 6           | 5 M<br>1 F                 | 24-40                          |
| 17. Singaraju et al 2008 | Case (arthroscopically assisted biceps tenodesis)           | Tendinopathy and tenosynovitis    | 6           | 3 M<br>3 F                 | 44-60                          |
|                          | Control (healthy cadavers)                                  | No Tendinopathy and tenosynovitis | 6           | 5 M<br>1 F                 | 42-81                          |
| 18. Andersson et al 2008 | Case (IF; chronic painful mid-portion Achilles tendinosis)  | Tendinopathy                      | 20          | 9 M<br>11F                 | 26-67                          |
|                          | Control (IF; healthy pain free Achilles' tendons)           | No Tendinopathy                   | 7           | 4 M<br>3 F                 | 33-46                          |
|                          | Case (ISH; chronic painful mid-portion Achilles tendinosis) | Tendinopathy                      | 9           | 3 M<br>6 F                 | 37-56                          |

| Study                        | Group                                                       | Tendon Status   | Sample Size | Sex         | Age, years (mean and/or range) |
|------------------------------|-------------------------------------------------------------|-----------------|-------------|-------------|--------------------------------|
|                              | Control (ISH; healthy pain free Achilles' tendons)          | No Tendinopathy | 3           | 3           | 47                             |
| 19. Bjur et al 2008          | Case (IF; chronic painful mid-portion Achilles tendinosis)  | Tendinopathy    | 21          | 8 M<br>13 F | 43 (mean age)<br>47 (mean age) |
|                              | Control (IF; healthy pain free Achilles' tendons)           | No Tendinopathy | 8           | 4 M<br>4 F  | 37 (mean age)<br>40 (mean age) |
|                              | Case (ISH; chronic painful mid-portion Achilles tendinosis) | Tendinopathy    | 2           |             |                                |
|                              | Control (ISH; healthy pain free Achilles' tendons)          | No Tendinopathy | 1           |             |                                |
| 20. Scott et al 2007         | Case (Patellar + Achilles tendinopathy)                     | Tendinopathy    | 1 + 13      | 19 M        | 18-54                          |
|                              | Control (healthy pain free individuals)                     | No Tendinopathy | 8 + 7       | 10 F        |                                |
| 21. Danielson et al 2007 (1) | Case (chronic painful tendinosis)                           | Tendinopathy    | 2           | 1 M<br>1 F  | 22<br>23                       |
|                              | Control (pain-free patellar tendon)                         | No Tendinopathy | 1           | 1 M         | 22                             |
| 22. Danielson et al 2007 (2) | Case ( <u>unspecified</u> surgical treatment)               | Tendinopathy    | 7           | 6 M         | 22-32                          |

| Study                    | Group                                                   | Tendon Status   | Sample Size | Sex         | Age, years (mean and/or range) |
|--------------------------|---------------------------------------------------------|-----------------|-------------|-------------|--------------------------------|
|                          |                                                         |                 |             | 1 F         |                                |
|                          | Control (normal control tissue- skin incision)          | No tendinopathy | 15          | 14 M<br>1 F | 20-47                          |
| 23. Danielson et al 2006 | Case (proximal patellar tendinopathy)                   | Tendinopathy    | 7           | 6M<br>1F    | 27 (22-32)                     |
|                          | Control (pain-free and normal patellar tendons)         | No Tendinopathy | 16          | 15M<br>1F   | 32.1, 20-47                    |
| 24. Lian et al 2006      | Case (jumper's knee)                                    | Tendinopathy    | 10          |             | 24-34                          |
|                          | Control (tibia fracture undergoing marrow nailing)      | No Tendinopathy | 10          |             | 19-43                          |
| 25. Bjur et al 2005      | Case (chronic painful mid-portion Achilles' tendinosis) | Tendinopathy    | 21          | 8 M<br>13 F | 35-54<br>34-56                 |
|                          | Control (normal Achilles' tendons)                      | No Tendinopathy | 9           | 4 M<br>5 F  | 35-60<br>22-46                 |
| 26. Forsgren et al 2005  | Case (Achilles' & Patellar tendinosis)                  | Tendinopathy    | 6<br>12     |             |                                |
|                          | Control (normal tendons)                                | No Tendinopathy | 13<br>5     |             |                                |
| 27. Alfredson et al 2001 | Case (chronic painful Achilles tendinosis)              | Tendinopathy    | 9           | 3 M<br>6 F  | 45 (mean)                      |



| Study                        | Group                                         | Tendon Status   | Sample Size | Sex        | Age, years (mean and/or range) |
|------------------------------|-----------------------------------------------|-----------------|-------------|------------|--------------------------------|
|                              | Control (normal (pain-free) Achilles tendons) | No Tendinosis   | 2           | 1 M<br>1 F | 39                             |
| 28. Alfredson et al 2000 (1) | Case ((Jumper's knee)                         | Tendinopathy    | 5           | 4 M<br>1 F | 23-31                          |
|                              | Control (healthy tendon)                      | No Tendinopathy | 5           | 4 M<br>1 F | 27-43                          |
| 29. Alfredson et al 2000 (2) | Case (surgical treatment of tennis elbow)     | Tennis Elbow    | 3           | 3 M<br>1 F | 29-54                          |
|                              | Control (painful elbow)                       | No tendinopathy | 2           | 2 F        | 28-43                          |
| 30. Alfredson et al 1999     | Case (Achilles tendinosis)                    | Tendinopathy    | 4           | 4M         | 40.7, 34-53                    |
|                              | Control (healthy tendon)                      | No Tendinopathy | 5           | 5M         | 37.2, 27-42                    |
| 31. Ljung et al 1999         | Case (tennis elbow)                           | Tendinopathy    | 6           | 3 M<br>3 F | 38-52                          |
|                              | Control (healthy tendon)                      | No tendinopathy | 6           | 5 M<br>1 F | 24-39                          |

Supplementary Table 3: Study Characteristics – part B

| No. | Study                    | Result                                                                                                                                                                                                                                                                                                                                                                                                                                                                                                                                                                                                                                                                                                                                                                                                                                                                                                                                                                                                        |
|-----|--------------------------|---------------------------------------------------------------------------------------------------------------------------------------------------------------------------------------------------------------------------------------------------------------------------------------------------------------------------------------------------------------------------------------------------------------------------------------------------------------------------------------------------------------------------------------------------------------------------------------------------------------------------------------------------------------------------------------------------------------------------------------------------------------------------------------------------------------------------------------------------------------------------------------------------------------------------------------------------------------------------------------------------------------|
| 1.  | Schmalz J et al., 2019   | NSE immunohistochemical staining observed high density of free nerve endings at the transition zone to the paratenon in inflamed tendons compared to the no tendinitis group.                                                                                                                                                                                                                                                                                                                                                                                                                                                                                                                                                                                                                                                                                                                                                                                                                                 |
| 2.  | Sahmey et al 2016        | <ul style="list-style-type: none"> <li>a) CGRP, PGP9.5 (a neuroendocrine marker) and SP immunoreactions also occurred in abnormal chondrocyte-like cells.</li> <li>b) SP-labelled fibres, more intimately associated with vessels, were only detected in some tendinopathic tendon</li> <li>c) a greater expression of SP in tendons that exhibited immature vessels.</li> <li>d) Synaptophysin-immunoreactive nerves were closely related to vessels in tendinopathy</li> </ul>                                                                                                                                                                                                                                                                                                                                                                                                                                                                                                                              |
| 3.  | Christensen J et al 2015 | <ul style="list-style-type: none"> <li>a) Double staining of the PAR receptors and SP showed that nerve fibres and fascicles expressing the PAR-receptors often co-localised with SP, however not all the nerve fibres expressing PARs were positive for SP.</li> <li>b) Protease activated receptors are expressed in the Achilles tendon and surrounding tissues <ul style="list-style-type: none"> <li>- PAR 1 and 4 predominantly in nerves, whilst PAR-2 by tenocytes</li> <li>- all 4 PAR receptors colocalised with SP positive nerve fibres</li> </ul> </li> </ul>                                                                                                                                                                                                                                                                                                                                                                                                                                    |
| 4.  | Dean et al 2015          | <ul style="list-style-type: none"> <li>- Results <ul style="list-style-type: none"> <li>o No difference in glutamate between groups (p=.86)</li> <li>o No difference in NMAR1 between groups (p=.61)</li> <li>o Significantly higher PGP-9.5 in painful group (3.75 vs 0.87) (p=.0079)</li> <li>o Significantly higher mGluR2 in painful group (0.064 vs 0.0019) (p=.05)</li> <li>o No difference in mGluR1</li> <li>o Significantly higher mGluR7 in pain-free group (0.18 vs 0.005) (p=.0019)</li> <li>o Significantly higher Kainate receptor 1 (KA1) in painful group (4.55 vs 0.85) (p=.0028)</li> <li>o *mGluR = metabotropic glutamate receptor</li> <li>o Correlations <ul style="list-style-type: none"> <li>▪ No strong correlation between PGP-9.5 &amp; glutamate receptor expression</li> <li>▪ No strong correlation between PGP-9.5 &amp; TNF-alpha expression</li> </ul> </li> <li>o Explored other inflammatory cells (macrophages etc), but doesn't seem as relevant</li> </ul> </li> </ul> |
| 5.  | Fearon et al 2014        | <ul style="list-style-type: none"> <li>- significantly greater presence of SP in the bursa but not in the tendon (p=.223) of subjects with GTPS vs controls</li> <li>- SP was expressed in fibroblast like cells embedded within the bursa stroma or within the tendon and in close association with vessels both in bursa and in tendon</li> </ul>                                                                                                                                                                                                                                                                                                                                                                                                                                                                                                                                                                                                                                                           |
| 6.  | Franklin et al 2014      | <ul style="list-style-type: none"> <li>a) Glutamate → P &lt; 0.001 tear vs control</li> <li>b) NMDAR1 → P &lt; 0.001 tear vs control</li> <li>c) mGluR2 → P=.008 overexpressed in tears vs control</li> <li>d) mGluR7 → dramatically reduced (P&lt;0.001)</li> <li>e) mGluR8 → significant in small tears vs large/medium tears (1-3 cm tears)</li> <li>f) NK-1 → lower vs control (p=0.007)</li> <li>g) BDKRB2 → reduced in tears (p=0.354)</li> <li>h) PGP9.5 → significant difference between small tear and large tear (p=.021)</li> </ul>                                                                                                                                                                                                                                                                                                                                                                                                                                                                |

|    |                       |                                                                                                                                                                                                                                                                                                                                                                                                                                                                                                                                                                                                                                                                                                                                                                                                                                                                                                                                                                                                                                                                 |
|----|-----------------------|-----------------------------------------------------------------------------------------------------------------------------------------------------------------------------------------------------------------------------------------------------------------------------------------------------------------------------------------------------------------------------------------------------------------------------------------------------------------------------------------------------------------------------------------------------------------------------------------------------------------------------------------------------------------------------------------------------------------------------------------------------------------------------------------------------------------------------------------------------------------------------------------------------------------------------------------------------------------------------------------------------------------------------------------------------------------|
|    |                       | <ul style="list-style-type: none"> <li>i) Nav1.7 → no significant difference</li> <li>j) TRPA1 → significantly reduced in small tears vs large ones (p=.001)</li> <li>k) No changes in SP and CGRP expression</li> <li>l) Increased expression of alpha-2a adrenergic receptors</li> <li>m) TH → reduced (p=.0235)</li> </ul>                                                                                                                                                                                                                                                                                                                                                                                                                                                                                                                                                                                                                                                                                                                                   |
| 7. | Sasaki et al., 2013   | <ul style="list-style-type: none"> <li>a) intensity of the PGP 9.5 and NPY was stronger in the tendinosis tissue compared to control tissue.</li> <li>b) decreased immunoreactivity of CGRP and SP in tendinosis tissue.</li> <li>c) increased sympathetic innervations + loss of sensory innervations of the tendinosis tissue at the ECRB capsule</li> <li>d) perivascular sensory innervation was limited in the tendinosis tissue whilst there were marked immunoreactions for sympathetic nerve markers</li> </ul>                                                                                                                                                                                                                                                                                                                                                                                                                                                                                                                                         |
| 8. | Tosounidis et al 2013 | <ul style="list-style-type: none"> <li>a) showed S-100 and NPY, adrenergic in 11/14 cases of RC tear and biceps tendinitis</li> <li>b) Alpha 1 adrenergic immunoreactions were positive in a subpopulation of cells that expressed NPY</li> </ul>                                                                                                                                                                                                                                                                                                                                                                                                                                                                                                                                                                                                                                                                                                                                                                                                               |
| 9. | Schizas et al 2012    | <ul style="list-style-type: none"> <li>a) increased tissue immunodensity of NMDAR1, phosphor-NMDAR1 and mGluR5, SP vs control</li> <li>b) NMDAR1 predominant in peritendinous tissue whilst phospho-NMDAR1 in tendon proper</li> <li>c) presence of sprouting nerve fibres in tendon proper (Positive PGP 9.5 staining)</li> <li>d) mGluR5 distinctive of late-stage tendinopathy, predominant on altered tenocytes and free nerve fibres in tendinopathy biopsies</li> <li>e) SP present on both peritendinous and tendon proper tissue</li> <li>f) SP on sprouting nerve fibres in 5 out 10 biopsies exhibiting signs of late stage tendinosis vs absent in control</li> <li>g) the occurrence and immunodensity of NMDAR1 correlated with that of SP in tendinopathic samples vs not so in control</li> <li>h) co-localisation between NMDAR1 and SP and phosphor-NMDAR1 and SP both in the tendinopathic and control biopsies, however only tendinopathic biopsies exhibited co-localisation of SP and phosphor-NMDAR1 within the tendon proper.</li> </ul> |
| 10 | Bagge et al 2012      | <ul style="list-style-type: none"> <li>- ISH results- <ul style="list-style-type: none"> <li>- tendinosis tenocytes showed specific BDNF mRNA reaction</li> <li>- specific mRNA reactions were noted for tenocytes in non-tendinosis patients</li> </ul> </li> <li>- IHC results- <ul style="list-style-type: none"> <li>- large number of tenocytes showed BDNF immunoreactivity in both tendinosis and non-tendinosis groups</li> <li>- BDNF is produced in the tenocytes of the human Achilles tendon, however BDNF immunolabelling and BDNF mRNA is not confined to all tenocytes in the Achilles tendon</li> </ul> </li> </ul>                                                                                                                                                                                                                                                                                                                                                                                                                             |
| 11 | Bjorklund et al 2011  | <ul style="list-style-type: none"> <li>- IHC-F results <ul style="list-style-type: none"> <li>a) Difference in CB1 expression between groups was statistically significant (P&lt;.05) with it being higher in the tendinosis group vs control</li> </ul> </li> </ul>                                                                                                                                                                                                                                                                                                                                                                                                                                                                                                                                                                                                                                                                                                                                                                                            |
| 12 | Xu et al 2011         | <ul style="list-style-type: none"> <li>- IHC results <ul style="list-style-type: none"> <li>a) Immunoreactivity for PGP9.5 and GAP43 was rarely seen in the tendon tissue proper, but rather in the paratendinous tissue and endotenon between collagen bundles and near blood vessels</li> </ul> </li> </ul>                                                                                                                                                                                                                                                                                                                                                                                                                                                                                                                                                                                                                                                                                                                                                   |

|    |                      |                                                                                                                                                                                                                                                                                                                                                                                                                                                                                                                                                                                                                                                                                                                                                                                                                                                                                                                                                                                                                                                                                                                                                                                                                                                                                                                                                                                                                                                                                                                                                                                                                                                                                                                                                                                                             |
|----|----------------------|-------------------------------------------------------------------------------------------------------------------------------------------------------------------------------------------------------------------------------------------------------------------------------------------------------------------------------------------------------------------------------------------------------------------------------------------------------------------------------------------------------------------------------------------------------------------------------------------------------------------------------------------------------------------------------------------------------------------------------------------------------------------------------------------------------------------------------------------------------------------------------------------------------------------------------------------------------------------------------------------------------------------------------------------------------------------------------------------------------------------------------------------------------------------------------------------------------------------------------------------------------------------------------------------------------------------------------------------------------------------------------------------------------------------------------------------------------------------------------------------------------------------------------------------------------------------------------------------------------------------------------------------------------------------------------------------------------------------------------------------------------------------------------------------------------------|
|    |                      | <ul style="list-style-type: none"> <li>b) Large groups of nerve fascicles observed in torn and matched tendon groups vs control <ul style="list-style-type: none"> <li>- GAP43 and PGP9.5 observed within tendon proper and or intimately associated with blood vessels</li> </ul> </li> <li>c) Quantitative analysis showed that number of PGP9.5 and GAP43 immunoreactive nerves were significantly higher in matched subscapularis tendons vs control subscapularis tendons (<math>P &lt; 0.05</math>) and torn supraspinatus tendons (<math>P &lt; .0002</math> and <math>P &lt; .0001</math>).</li> </ul>                                                                                                                                                                                                                                                                                                                                                                                                                                                                                                                                                                                                                                                                                                                                                                                                                                                                                                                                                                                                                                                                                                                                                                                              |
| 13 | Schizas et al 2010   | <p>Quantitative Assessment</p> <ol style="list-style-type: none"> <li>1) <b>NMDAR1</b> <ul style="list-style-type: none"> <li>a) No vessels within the tendon proper,</li> <li>b) vascular <b>NMDAR1</b> in the tendon proper (5.9%) of tendinopathic group exhibited similar levels as in the paratendinous tissue</li> <li>c) 9 fold increase in vascular NMDAR 1 in tendinopathic tenocytes vs control</li> </ul> </li> <li>2) <b>Glutamate</b> <ul style="list-style-type: none"> <li>a) Glutamate occurrence in vessels and cells was elevated 10 times in tendinopathic group</li> <li>b) Increased number of glutamate positive tenocytes in tendinopathic tendons vs control (<math>p = 0.009</math>)</li> <li>c) Vascular glutamate localised in the paratendinous tissue higher vs control</li> </ul> </li> <li>3) <b>Correlation of NMDAR1 and glutamate occurrence:</b> no correlation found in either 2 groups</li> </ol> <p>Combined IF and DAB staining</p> <ol style="list-style-type: none"> <li>1) NMDAR1 <ul style="list-style-type: none"> <li>a) Increased NMDAR1 immunoreaction in painful tendons, localisation of increased NMDAR1 immunostaining in tendinopathic samples</li> <li>b) Occurrence of NMDAR1 with PGP9.5- elevated in tendinopathy vs control</li> </ul> </li> <li>2) Glutamate <ul style="list-style-type: none"> <li>a) Glutamate was elevated in tendinopathic tissue vs control</li> <li>b) Occurrence of glutamate with PGP9.5- in tendinopathy vs control</li> <li>c) Increased glutamate positive tenocytes in tendinopathic tissue vs control</li> </ul> </li> <li>3) Co-localisation of NMDAR1 and glutamate: <ul style="list-style-type: none"> <li>a) Demonstrated in nerve fibres in all tendinopathic tissues vs none in control</li> </ul> </li> </ol> |
| 14 | Bagge et al 2009     | There are marked immunoreactions for the neurotrophins NGF and BDNF and for the p75 receptor, but not for TrkA or TrkB, in the tenocytes of the human Achilles tendon                                                                                                                                                                                                                                                                                                                                                                                                                                                                                                                                                                                                                                                                                                                                                                                                                                                                                                                                                                                                                                                                                                                                                                                                                                                                                                                                                                                                                                                                                                                                                                                                                                       |
| 15 | Bjur et al 2009      | <ul style="list-style-type: none"> <li>a) NPY- immunoreactions were seen in the nerve fascicles, and mildly in the perivascular nerve fibres, but none in the tenocytes.</li> <li>b) Y1 receptor- immunoreactions present in both non-tendinosis and tendinosis groups, seen in tenocytes and blood vessel walls <ul style="list-style-type: none"> <li>- stronger immunoreactions present in tendinosis group vs control (<math>p &lt; 0.01</math>)</li> </ul> </li> <li>c) Y2 Receptor- no immunoreactions in blood vessels walls, tenocytes or nerve fascicles.</li> </ul> <p>-</p>                                                                                                                                                                                                                                                                                                                                                                                                                                                                                                                                                                                                                                                                                                                                                                                                                                                                                                                                                                                                                                                                                                                                                                                                                      |
| 16 | Zeisiget al 2009     | <ul style="list-style-type: none"> <li>- showed presence of catecholamine-synthesising enzyme TH in the fibroblasts of the tissue samples from 4/7 patients with TE and 2/4 patients with GE, and no detectable levels of this enzyme were found in fibroblasts of control tissue from the lateral epicondyle (0/6).</li> <li>- no evidence of such production in patients with TE or GE was found in the present study using staining for the ACh-synthesising enzyme ChAT.</li> <li>- no evidence of nerves positive for ChAT, whereas several nerve structures displaying TH-immunohistochemical reactions were detected.</li> </ul>                                                                                                                                                                                                                                                                                                                                                                                                                                                                                                                                                                                                                                                                                                                                                                                                                                                                                                                                                                                                                                                                                                                                                                     |
| 17 | Singaraju et al 2008 | The IHC staining detecting CGRP and substance P was found globally throughout the tendon body in the proximal and distal sections of both groups with no significant differences between the control and experimental tendons.                                                                                                                                                                                                                                                                                                                                                                                                                                                                                                                                                                                                                                                                                                                                                                                                                                                                                                                                                                                                                                                                                                                                                                                                                                                                                                                                                                                                                                                                                                                                                                              |

|    |                          |                                                                                                                                                                                                                                                                                                                                                                                                                                                                                                                                                                                                                                                                                                                                                                                                                                                                                                                                                                                                                                                                                                                                                                                                                                                                                                                                                                                                   |
|----|--------------------------|---------------------------------------------------------------------------------------------------------------------------------------------------------------------------------------------------------------------------------------------------------------------------------------------------------------------------------------------------------------------------------------------------------------------------------------------------------------------------------------------------------------------------------------------------------------------------------------------------------------------------------------------------------------------------------------------------------------------------------------------------------------------------------------------------------------------------------------------------------------------------------------------------------------------------------------------------------------------------------------------------------------------------------------------------------------------------------------------------------------------------------------------------------------------------------------------------------------------------------------------------------------------------------------------------------------------------------------------------------------------------------------------------|
| 18 | Andersson et al 2008     | <ul style="list-style-type: none"> <li>- The nerve fascicles were seen to contain nerve fibers showing SP-immunoreactions.</li> <li>- The results of the present study show that tenocytes of Achilles tendons display expression of SP and NK-1 R.</li> <li>- Expression at both protein and mRNA levels was shown for the NK-1 R, whilst SP was demonstrated at the mRNA level.</li> <li>- The labelling was detected for a subpopulation of the tenocytes, the semi-quantitative estimations suggesting higher expression levels of both NK-1 R and SP in tendinosis tendons compared with normal tendons.</li> </ul>                                                                                                                                                                                                                                                                                                                                                                                                                                                                                                                                                                                                                                                                                                                                                                          |
| 19 | Bjur et al 2008          | <ul style="list-style-type: none"> <li>- TH and NPY innervation perivascularly in both control and tendinosis tendons for both paratendinous CT and tendon tissue proper</li> <li>- Distinct occurrence of alpha 1 adrenoreceptors including in tenocytes in tendinosis specimens</li> <li>- Tendinopathic tenocytes had the occurrence of TH-LI</li> <li>- TH immunoreactions were more common in tenocytes than nerves</li> <li>- TH mRNA- ISH reactions were observed for tenocytes</li> <li>- Limited sympathetic innervation but abundant adrenoreceptors</li> </ul>                                                                                                                                                                                                                                                                                                                                                                                                                                                                                                                                                                                                                                                                                                                                                                                                                         |
| 20 | Scott et al 2007         | <p>IHC-F results</p> <ul style="list-style-type: none"> <li>- VGlut1- no immunoreactions in tendon</li> <li>- VGlut2 immunofluorescence was observed in tendon- in tenocytes</li> <li>- Semiquantitative grading revealed a significantly greater expression of VGLuT2 in tenocytes from tendinosis patients than in those of controls (p=.005).</li> </ul> <p>In situ Hybridisation</p> <ul style="list-style-type: none"> <li>- VGLuT2 mRNA expression in tenocytes</li> </ul>                                                                                                                                                                                                                                                                                                                                                                                                                                                                                                                                                                                                                                                                                                                                                                                                                                                                                                                  |
| 21 | Danielson et al 2007 (1) | <p>ISH results</p> <ul style="list-style-type: none"> <li>- Tenocytes of the tendinosis specimens displayed a stronger and more frequent AP reactions vs control</li> <li>- Occurrence of mRNA for TH in tenocytes is positive</li> </ul>                                                                                                                                                                                                                                                                                                                                                                                                                                                                                                                                                                                                                                                                                                                                                                                                                                                                                                                                                                                                                                                                                                                                                         |
| 22 | Danielson et al 2007 (2) | <ul style="list-style-type: none"> <li>- IHC results: General and Sensory Innervation Patterns             <ol style="list-style-type: none"> <li>1) PGP 9.5- specific reactions for PGP 9.5 abundant in areas of loose CT</li> <li>2) SP/ CGRP or SP-CGRP-LI were overall rarely detected in specimens of the tendinosis tendons; this corresponded to the normal tendon tissue proper</li> <li>3) Sympathetic innervation patterns                 <ul style="list-style-type: none"> <li>- Normal tendons: lower NPY and TH immunoreactive nerve fibres than in the loose paratendinous CT</li> <li>- Tendinosis Tendons: NPY &amp; TH immunoreactive nerve fibres abundant in loose CT and around blood vessels</li> <li>- not a lot of difference btw normal and tendinosis samples</li> </ul> </li> <li>4) Adrenergic Receptors                 <ul style="list-style-type: none"> <li>- nerve fascicles in the tendinous tissue displayed an immunoreaction pattern for adrenergic receptors similar to that of the loose paratendinous CT of controls, with greatest immunoreaction being for alpha 1 adrenoreceptor</li> <li>- alpha-1 adrenoreceptors in tendinosis tendon vasculature was more marked vs control by semiquantitative analysis</li> <li>- limited immunoreactions for alpha 2A adrenoreceptors in both healthy and tendinosis tissue</li> </ul> </li> </ol> </li> </ul> |

|    |                      |                                                                                                                                                                                                                                                                                                                                                                                                                                                                                                                                                                                                                                                                                                                                                                                                                                                                                                                                                                                                                                                                                                                                                                                                                                                                                                                                                                                                                                                                                   |
|----|----------------------|-----------------------------------------------------------------------------------------------------------------------------------------------------------------------------------------------------------------------------------------------------------------------------------------------------------------------------------------------------------------------------------------------------------------------------------------------------------------------------------------------------------------------------------------------------------------------------------------------------------------------------------------------------------------------------------------------------------------------------------------------------------------------------------------------------------------------------------------------------------------------------------------------------------------------------------------------------------------------------------------------------------------------------------------------------------------------------------------------------------------------------------------------------------------------------------------------------------------------------------------------------------------------------------------------------------------------------------------------------------------------------------------------------------------------------------------------------------------------------------|
|    |                      | <ul style="list-style-type: none"> <li>- no general difference in the occurrence of beta1-adrenoreceptor in tendinosis vs control</li> <li>- tenocytes exhibited adrenergic receptor LI, alpha 2A adrenoreceptor-LI with more distinct immunoreaction compared to control</li> </ul> <p>5) TH-like immunoreactions (-LI) in tenocytes</p> <ul style="list-style-type: none"> <li>- immunoreactions more distinct in tendinosis tendon samples vs normal</li> </ul> <p>6) The amount of sympathetic innervation did not match the quantity of adrenergic receptors in the tendon tissue proper of the patellar tendon, particularly in tendinosis.</p> <ul style="list-style-type: none"> <li>- These findings suggest that locally produced catecholamines can be mediators that bind to the frequently occurring adrenergic receptors</li> </ul>                                                                                                                                                                                                                                                                                                                                                                                                                                                                                                                                                                                                                                 |
| 23 | Danielson et al 2006 | <ul style="list-style-type: none"> <li>- Results <ul style="list-style-type: none"> <li>o M2 receptor <ul style="list-style-type: none"> <li>▪ Immunoreaction in blood vessel walls observed in both groups, more pronounced in tendinosis group particularly in those with hyper cellularity</li> <li>▪ No immunoreaction in tenocytes &amp; nerve fascicles observed in controls</li> <li>▪ Immunoreaction in tenocytes &amp; nerve fascicles observed in specimens, particularly in those with hypercellularity</li> </ul> </li> <li>o Choline acetyltransferase (ChAT) <ul style="list-style-type: none"> <li>▪ No immunoreaction in blood vessels or tenocytes in control</li> <li>▪ Immunoreaction in blood vessels observed in tendinosis, particularly in those with profound hyper cellularity or abnormally appearing tenocytes</li> <li>▪ No immunoreaction in tenocytes in specimens</li> </ul> </li> <li>o Vesicular Acetylcholine transporter (VAcHT) <ul style="list-style-type: none"> <li>▪ No immunoreaction in blood vessels or tenocytes in control</li> <li>▪ Some immunoreaction in tenocytes seen in specimens, more so in those with hypercellularity or with abnormal appearance</li> <li>▪ No immunoreaction in blood vessels in specimens</li> </ul> </li> <li>o Acetylcholinesterase (AChE)</li> </ul> </li> </ul> <p>Immunoreaction observed in blood vessels &amp; tenocytes of both groups, with no convincing differences between both groups</p> |
| 24 | Lian et al 2006      | <p>Semiquantitative Analysis tendon vs control</p> <ul style="list-style-type: none"> <li>- higher occurrence of SP= 0.567</li> <li>- higher occurrence of PGP= 0.098</li> <li>- lower occurrence of TH = 0.018</li> </ul>                                                                                                                                                                                                                                                                                                                                                                                                                                                                                                                                                                                                                                                                                                                                                                                                                                                                                                                                                                                                                                                                                                                                                                                                                                                        |
| 25 | Bjur et al 2005      | <p>IHC results</p> <ol style="list-style-type: none"> <li>a) Innervation patterns- PGP9.5 was seen in tendinosis tissue, the staining was seen intimately associated with fine blood vessels unlike control</li> <li>b) Immunoreactions against CPRP and SP were also detected in thin nerve fascicles and as freely coursing nerve fibres, sometimes being closely located to fine blood vessels</li> <li>c) In normal tendon specimens, the immunoreaction for CGRP was more marked than that for SP</li> <li>d) CGRP/SP immunoreaction was only observed in the association with a subpopulation of the blood vessels</li> </ol>                                                                                                                                                                                                                                                                                                                                                                                                                                                                                                                                                                                                                                                                                                                                                                                                                                               |

|    |                          |                                                                                                                                                                                                                                                                                                                                                                                                                                                                                                                                                        |
|----|--------------------------|--------------------------------------------------------------------------------------------------------------------------------------------------------------------------------------------------------------------------------------------------------------------------------------------------------------------------------------------------------------------------------------------------------------------------------------------------------------------------------------------------------------------------------------------------------|
| 26 | Forsgren et al 2005      | <ul style="list-style-type: none"> <li>- A variety of NK-1R antibodies were used</li> <li>- Results (pretty rubbish in my opinion). <ul style="list-style-type: none"> <li>o NK-1R immunoreaction found in blood vessel walls (greater extent) in both groups</li> <li>o NK-1R immunoreaction found in nerve fibers/ fascicles (lesser extent) in both groups</li> </ul> </li> </ul> <p>NK-1R immunoreaction occurred to various extents in both tendinosis groups, with greater presence in tendinosis specimens with pronounced vascularization.</p> |
| 27 | Alfredson et al 2001     | <p>Results (Achilles tendon)</p> <ul style="list-style-type: none"> <li>- Micro dialysis- presence of free glutamate in all tendons <ul style="list-style-type: none"> <li>a) Tendinosis- 78-250umol/l</li> <li>b) No tendinosis- 16-34umol/l</li> </ul> </li> <li>- NMDAR1 receptor detected in all tissues</li> </ul> <p>AChE and NMDAR1 reactions often localised to similar structures</p>                                                                                                                                                         |
| 28 | Alfredson et al 2000 (1) | <p>Results (Patellar tendon) Microdialysis- HPLC and IHC:</p> <ul style="list-style-type: none"> <li>- The mean concentration of glutamate was significantly higher than the mean concentration for glutamate in control</li> <li>- No significant differences between the mean conc of PGE2 in tendonosis vs control</li> </ul> <p>Glutamate NMDAR1 receptors present in all tendons (localised to AChE structures)</p>                                                                                                                               |
| 29 | Alfredson et al 2000 (2) | <p>Results: Microdialysis</p> <p>ECRB tendons had higher conc of glutamate vs control (p&lt;.001)</p>                                                                                                                                                                                                                                                                                                                                                                                                                                                  |
| 30 | Alfredson et al 1999     | <ul style="list-style-type: none"> <li>- Microdialysis results <ul style="list-style-type: none"> <li>o Glutamate concentration was significantly higher in tendinosis (<math>196 \pm 59 \mu\text{mol/l}</math>) vs controls (<math>48 \pm 27 \mu\text{mol/l}</math>) across all timepoints over 4hr period (p&lt;.05)</li> <li>o No significant difference in mean concentrations of glutamate over 4hrs between 2 groups</li> </ul> </li> <li>- No significant difference in PGE2 or mean PGE2 between 2 groups</li> </ul>                           |
| 31 | Ljung et al 1999         | <ul style="list-style-type: none"> <li>- A quantitative analysis of the vessels and nerves in patients with tennis elbow compared to those in control was not possible.</li> <li>- The extensor carpi radialis brevis muscle is supplied with SP and CGPR</li> </ul>                                                                                                                                                                                                                                                                                   |

Supplementary Table 4: A summary of the most important findings of each study.



| Article No.                  | SP | CGRP | NMDAR Receptors | Glutamate | Glutamate Receptors mGlu | PGP 9.5 | NK-1R | Tyrosine hydroxylase | Neuropeptide-Y (NPY) | NPY Receptors | AChE | Adrenoreceptors | Others                        |
|------------------------------|----|------|-----------------|-----------|--------------------------|---------|-------|----------------------|----------------------|---------------|------|-----------------|-------------------------------|
| 1. Schmalzl J et al., 2019   |    |      |                 |           |                          |         |       |                      |                      |               |      |                 | Neuron-Specific Enolase (NSE) |
| 2. Sahmey et al 2016         | ✓  | ✓    |                 |           |                          | ✓       |       |                      |                      |               |      |                 |                               |
| 3. Christensen et al., 2015  | ✓  |      |                 |           |                          |         |       |                      |                      |               |      |                 | PAR receptors                 |
| 4. Dean et al 2016           |    |      | ✓               | ✓         | ✓                        | ✓       |       |                      |                      |               |      |                 | KA1                           |
| 5. Fearon et al 2014         | ✓  |      |                 |           |                          |         |       |                      |                      |               |      |                 |                               |
| 6. Franklin et al 2014       | ✓  | ✓    | ✓               |           | ✓                        | ✓       | ✓     | ✓                    |                      |               |      | ✓               | Nav1.7<br>TRPA1 BDKRB2        |
| 7. Sasaki et al 2013         | ✓  | ✓    |                 |           |                          | ✓       |       |                      | ✓                    |               |      |                 |                               |
| 8. Tosounidis et al 2013     |    |      |                 |           |                          |         |       |                      | ✓                    |               |      | ✓               | S-100                         |
| 9. Schizas et al 2012        | ✓  |      | ✓               |           | ✓                        | ✓       |       |                      |                      |               |      |                 |                               |
| 10. Bagge et al 2012         |    |      |                 |           |                          |         |       |                      |                      |               |      |                 | BDNF                          |
| 11. Bjorklund et al 2011     |    |      |                 |           |                          |         |       |                      |                      |               |      |                 | CB1                           |
| 12. Xu et al 2011            |    |      |                 |           |                          | ✓       |       |                      |                      |               |      |                 | GAP 43                        |
| 13. Schizas et al 2010       |    |      | ✓               | ✓         |                          |         |       |                      |                      |               |      |                 |                               |
| 14. Bagge et al 2009         |    |      |                 |           |                          |         |       |                      |                      |               |      |                 | NGF<br>BDNF<br>P75            |
| 15. Bjur et al 2009          |    |      |                 |           |                          |         |       |                      | ✓                    | ✓             |      |                 |                               |
| 16. Zeisiget et al 2009      |    |      |                 |           |                          |         |       | ✓                    |                      |               |      |                 |                               |
| 17. Singaraj et al 2008      | ✓  | ✓    |                 |           |                          |         |       |                      |                      |               |      |                 |                               |
| 18. Andersson et al 2008     | ✓  |      |                 |           |                          |         | ✓     |                      |                      |               |      |                 |                               |
| 19. Bjur et al 2008          |    |      |                 |           |                          |         |       | ✓                    | ✓                    |               |      | ✓               |                               |
| 20. Scott et al 2007         |    |      |                 |           | ✓                        |         |       |                      |                      |               |      |                 |                               |
| 21. Danielson et al 2007 (1) |    |      |                 |           |                          |         |       | ✓                    |                      |               |      |                 |                               |

|     |                          |   |   |   |   |  |   |   |   |   |  |  |   |                                |
|-----|--------------------------|---|---|---|---|--|---|---|---|---|--|--|---|--------------------------------|
| 22. | Danielson et al 2007 (2) | ✓ | ✓ |   |   |  | ✓ |   | ✓ | ✓ |  |  | ✓ |                                |
| 23. | Danielson et al 2006     |   |   |   |   |  |   |   |   |   |  |  | ✓ | M2 Ach Receptor<br>ChAT, VAcHT |
| 24. | Lian et al 2006          | ✓ |   |   |   |  | ✓ |   | ✓ |   |  |  |   |                                |
| 25. | Bjur et al 2005          | ✓ | ✓ |   |   |  | ✓ |   |   |   |  |  |   |                                |
| 26. | Forsgren et al 2005      |   |   |   |   |  |   | ✓ |   |   |  |  |   |                                |
| 27. | Alfredson et al 2001     |   |   | ✓ | ✓ |  |   |   |   |   |  |  | ✓ |                                |
| 28. | Alfredson et al 2000 (1) |   |   | ✓ | ✓ |  |   |   |   |   |  |  | ✓ |                                |
| 29. | Alfredson et al 2000 (2) |   |   |   | ✓ |  |   |   |   |   |  |  |   |                                |
| 30. | Alfredson et al 1999     |   |   |   | ✓ |  |   |   |   |   |  |  |   |                                |
| 31. | Ljung et al 1999         | ✓ | ✓ |   |   |  |   |   |   |   |  |  |   |                                |

Supplementary Table 5: Markers of neurogenic inflammation assessed in each study

| High Quality (Score: >12)  | Quality Assessment Score | Moderate Quality (Score: 10-12) | Quality Assessment Score | Low Quality (Score: <10)     | Quality Assessment Score |
|----------------------------|--------------------------|---------------------------------|--------------------------|------------------------------|--------------------------|
|                            | 11                       | Sahemey R et. al, 2016)         | 10                       | Schmalzl et. al, 2019        | 9                        |
| Dean B. J. et al, 2015     | 15                       | Zeisig E et. al, 2009           | 11                       | Bagge J et. al, 2009         | 6                        |
| Franklin S. L. et al, 2014 | 14                       | Lian O et. al, 2006             | 11                       | Bjur D, et. al, 2009         | 9                        |
| Fearon A. M. et al, 2014   | 15                       | Sasaki K. et. al, 2013          | 12                       | Andersson G; et. al, 2008    | 4                        |
| Tosounidis T. et al, 2013  | 15                       | Bagge et. al, 2012              | 10                       | Bjur D et. al, 2008          | 6                        |
| Xu Y et. al 2011           | 13                       | Schizas N. et. al, 2010         | 10                       | Scott A et. al, 2007         | 9                        |
|                            |                          | Singaraju V. M. et. al, 2008    | 10                       | Danielson P et. al, 2007 (1) | 7                        |
|                            |                          | Christensen J et al, 2015       | 11                       | Danielson P et. al, 2007 (2) | 7                        |
|                            |                          | Schizas et al, 2012             | 11                       | Danielson, P, et. al, 2006   | 7                        |
|                            |                          | Bjorklund et. al, 2011          | 11                       | Bjur D et. al, 2005          | 7                        |
|                            |                          |                                 |                          | Forsgren, S et. al, 2005     | 5                        |
|                            |                          |                                 |                          | Alfredson H et. al, 2001     | 5                        |
|                            |                          |                                 |                          | Alfredson H et. al, 2000 (1) | 9                        |
|                            |                          |                                 |                          | Alfredson, et. al, 2000 (2)  | 9                        |
|                            |                          |                                 |                          | Ljung B. O et. al, 1999      | 6                        |
|                            |                          |                                 |                          | Alfredson, H. et. al, 1999   | 8                        |

Supplementary table 6. Results of study quality assessment
